# Supplementary material for: Full-length transcriptome analysis of Spodoptera frugiperda larval brain reveals detoxification genes
Source: PeerJ. 2021 Aug 24;9:e12069. doi: 10.7717/peerj.12069 (PMC8395580; doi:10.7717/peerj.12069)
Supplement: Supplemental Information 1 [file peerj-09-12069-s001.xls]

## Sheet: P450
Qeury		NR tophit
Name	Length	Accession number	Similarity (%)	Description
PB.1183.1	1905	AGO62007.1	99.8	cytochrome P450 CYP321A9 [Spodoptera frugiperda]
PB.1184.1	1877	AGO62007.1	99.6	cytochrome P450 CYP321A9 [Spodoptera frugiperda]
PB.1239.1	1857	AUN86404.1	95.7	cytochrome p450 4L10 [Spodoptera litura]
PB.1240.1	1693	XP_022829463.1	99.2	cytochrome P450 4d2-like [Spodoptera litura]
PB.1240.2	477	AFP20599.1	99.1	cytochrome CYP4L12 [Spodoptera littoralis]
PB.1241.1	1680	ASO98039.1	98.4	cytochrome p450 CYP4L9 [Spodoptera exigua]
PB.1242.1	1690	ASO98039.1	98.6	cytochrome p450 CYP4L9 [Spodoptera exigua]
PB.2538.1	2447	XP_022837760.1	96.1	cytochrome P450 CYP12A2-like [Spodoptera litura]
PB.2637.1	2526	ABC84370.2	97.6	cytochrome P450 [Spodoptera litura]
PB.2638.1	2421	ABC84370.2	97.3	cytochrome P450 [Spodoptera litura]
PB.2638.2	2317	ABC84370.2	92.9	cytochrome P450 [Spodoptera litura]
PB.2730.1	3263	XP_022824454.1	97	cytochrome P450 6k1-like [Spodoptera litura]
PB.2730.2	1708	XP_022824454.1	97	cytochrome P450 6k1-like [Spodoptera litura]
PB.2730.3	3827	ASO98022.1	97.9	cytochrome p450 CYP332A1 [Spodoptera exigua]
PB.2753.1	3004	ASO98028.1	98	cytochrome p450 CYP304F1 [Spodoptera exigua]
PB.2754.1	3060	ASO98028.1	98.4	cytochrome p450 CYP304F1 [Spodoptera exigua]
PB.2853.1	2505	XP_022824882.1	94.6	cytochrome P450 6B2-like isoform X3 [Spodoptera litura]
PB.2854.1	2479	ASO98006.1	98.1	cytochrome p450 CYP6AE47 [Spodoptera exigua]
PB.2855.1	2488	XP_022824880.1	96.2	cytochrome P450 6B5-like isoform X1 [Spodoptera litura]
PB.3170.1	4467	XP_022820166.1	96.2	cytochrome P450 6a2-like [Spodoptera litura]
PB.3171.1	4389	XP_022820166.1	96.4	cytochrome P450 6a2-like [Spodoptera litura]
PB.3172.1	4467	XP_022820166.1	96.4	cytochrome P450 6a2-like [Spodoptera litura]
PB.3179.1	2343	XP_022816126.1	95.5	cytochrome P450 4V2-like [Spodoptera litura]
PB.3180.1	2498	XP_022816126.1	95.9	cytochrome P450 4V2-like [Spodoptera litura]
PB.3300.1	2820	XP_022833232.1	98.9	cytochrome P450 307a1-like [Spodoptera litura]
PB.3301.1	2450	XP_022833232.1	98.9	cytochrome P450 307a1-like [Spodoptera litura]
PB.3494.1	1925	XP_022816194.1	98.8	uncharacterized protein LOC111349331 [Spodoptera litura]
PB.3494.2	564	XP_022816194.1	97.8	uncharacterized protein LOC111349331 [Spodoptera litura]
PB.3494.3	928	XP_022816194.1	99.1	uncharacterized protein LOC111349331 [Spodoptera litura]
PB.3495.1	1997	XP_022816194.1	98.6	uncharacterized protein LOC111349331 [Spodoptera litura]
PB.4515.1	2057	AGO62000.1	100	cytochrome P450 CYP4G74 [Spodoptera frugiperda]
PB.4532.1	2015	XP_022824481.1	97.3	cytochrome P450 6B2-like [Spodoptera litura]
PB.4564.1	1923	XP_022828927.1	98.8	cytochrome P450 4g15-like [Spodoptera litura]
PB.4624.1	1731	XP_022834509.1	98.8	cytochrome P450 6k1-like [Spodoptera litura]
PB.5419.1	3030	XP_022813948.1	97.2	probable cytochrome P450 49a1 [Spodoptera litura]
PB.5510.1	2649	XP_022823391.1	99.1	probable cytochrome P450 49a1 [Spodoptera litura]
PB.5552.1	2568	CAJ31114.1	99.2	cytochrome P450 [Spodoptera littoralis]
PB.5557.1	2528	XP_022817035.1	97.2	cytochrome P450 6B7-like [Spodoptera litura]
PB.5557.2	1239	XP_022817035.1	96.4	cytochrome P450 6B7-like [Spodoptera litura]
PB.556.1	2710	XP_022824780.1	98.9	cytochrome P450 6B1-like [Spodoptera litura]
PB.556.2	2372	XP_022824780.1	98.9	cytochrome P450 6B1-like [Spodoptera litura]
PB.562.1	2620	XP_022824436.1	97.2	cytochrome P450 4C1-like [Spodoptera litura]
PB.562.2	2684	XP_022824436.1	97.2	cytochrome P450 4C1-like [Spodoptera litura]
PB.562.3	1653	AFP20600.1	99.5	cytochrome CYP4S8v1 [Spodoptera littoralis]
PB.5621.1	2341	XP_022824479.1	97.8	cytochrome P450 6B6-like [Spodoptera litura]
PB.5649.1	2245	ASO98004.1	93.6	cytochrome p450 CYP6B68 [Spodoptera exigua]
PB.5671.1	2147	NP_001350218.1	96.2	cytochrome P450 4g1-like [Spodoptera litura]
PB.5671.2	1060	NP_001350218.1	96.1	cytochrome P450 4g1-like [Spodoptera litura]
PB.828.1	2227	XP_022831304.1	98.2	cytochrome P450 9e2-like [Spodoptera litura]
PB.829.1	2186	XP_022831304.1	98	cytochrome P450 9e2-like [Spodoptera litura]
PB.829.2	1811	XP_022831304.1	98	cytochrome P450 9e2-like [Spodoptera litura]
PB.912.1	1853	XP_022830964.1	94.3	LOW QUALITY PROTEIN: uncharacterized protein LOC111359602 [Spodoptera litura]
PB.914.1	2148	XP_022830966.1	98.3	uncharacterized protein LOC111359604 [Spodoptera litura]
PB.915.1	2209	XP_022830966.1	98.5	uncharacterized protein LOC111359604 [Spodoptera litura]
PB.915.2	899	XP_022830966.1	99.2	uncharacterized protein LOC111359604 [Spodoptera litura]
PB.916.1	1780	AKH15488.1	96.5	cytochrome P450 [Spodoptera litura]
PB.916.2	2201	AKH15488.1	96.5	cytochrome P450 [Spodoptera litura]
PB.917.1	1867	XP_022830865.1	97.4	cytochrome P450 9e2-like [Spodoptera litura]
PB.918.1	1968	AYA28075.1	78	cytochrome P450 SE-CYP9A21v3
PB.918.2	1870	XP_022830964.1	93.2	LOW QUALITY PROTEIN: uncharacterized protein LOC111359602 [Spodoptera litura]
PB.919.1	1825	XP_022830964.1	89.1	LOW QUALITY PROTEIN: uncharacterized protein LOC111359602 [Spodoptera litura]
PB.920.1	1759	XP_022830966.1	95.3	uncharacterized protein LOC111359604 [Spodoptera litura]
PB.921.1	2012	XP_022830966.1	94.6	uncharacterized protein LOC111359604 [Spodoptera litura]
PB.922.1	2072	AID55431.1	99.4	cytochrome P450 9A60 [Spodoptera frugiperda]
PB.922.2	1783	AID55431.1	99.4	cytochrome P450 9A60 [Spodoptera frugiperda]
PB.923.1	1822	AID55431.1	99.6	cytochrome P450 9A60 [Spodoptera frugiperda]
PB.924.1	2008	XP_022830967.1	93	LOW QUALITY PROTEIN: uncharacterized protein LOC111359605 [Spodoptera litura]
PB.924.2	948	XP_022830967.1	94.4	LOW QUALITY PROTEIN: uncharacterized protein LOC111359605 [Spodoptera litura]
PB.925.1	2232	XP_022830967.1	91.9	LOW QUALITY PROTEIN: uncharacterized protein LOC111359605 [Spodoptera litura]
PB.926.1	1898	XP_022830967.1	92.9	LOW QUALITY PROTEIN: uncharacterized protein LOC111359605 [Spodoptera litura]
PB.927.1	2000	AID55429.1	100	cytochrome P450 9A58 [Spodoptera frugiperda]
PB.927.2	1929	AID55429.1	100	cytochrome P450 9A58 [Spodoptera frugiperda]
PB.928.1	1963	AID55429.1	99.6	cytochrome P450 9A58 [Spodoptera frugiperda]
PB.929.1	2126	AID55430.1	99.6	cytochrome P450 9A59 [Spodoptera frugiperda]
PB.930.1	2159	AID55430.1	99.1	cytochrome P450 9A59 [Spodoptera frugiperda]
PB.931.1	2280	XP_022819612.1	98.3	cytochrome P450 9e2-like [Spodoptera litura]
PB.931.2	2193	XP_022819612.1	98.3	cytochrome P450 9e2-like [Spodoptera litura]
PB.932.1	2485	XP_022819612.1	98.3	cytochrome P450 9e2-like [Spodoptera litura]
PB.932.2	1721	XP_022819612.1	98.3	cytochrome P450 9e2-like [Spodoptera litura]
PB.933.1	1876	XP_022830966.1	88.9	uncharacterized protein LOC111359604 [Spodoptera litura]
PB.933.2	1787	XP_022830966.1	88.9	uncharacterized protein LOC111359604 [Spodoptera litura]
PB.934.1	1852	XP_022830967.1	91.9	LOW QUALITY PROTEIN: uncharacterized protein LOC111359605 [Spodoptera litura]
PB.967.1	2057	AGO62001.1	100	cytochrome P450 CYP4G75 [Spodoptera frugiperda]
PB.967.2	854	AFP20598.1	100	cytochrome CYP4G75 [Spodoptera littoralis]

## Sheet: ABC
Qeury		NR tophit
Name	Length	Accession number	Similarity (%)	Description
PB.1053.1	1023	OWR50358.1	96.9	pixie [Danaus plexippus plexippus]
PB.1054.1	1999	XP_022815393.1	100	ATP-binding cassette sub-family E member 1 [Spodoptera litura]
PB.1054.2	638	XP_022815393.1	100	ATP-binding cassette sub-family E member 1 [Spodoptera litura]
PB.2696.1	4636	XP_022815793.1	95.1	ATP-binding cassette sub-family B member 8, mitochondrial-like [Spodoptera litura]
PB.2697.1	4412	XP_022815793.1	95.1	ATP-binding cassette sub-family B member 8, mitochondrial-like [Spodoptera litura]
PB.2735.1	4855	XP_022832438.1	98.4	ATP-binding cassette sub-family F member 2 [Spodoptera litura]
PB.2735.2	4694	XP_022832438.1	98.4	ATP-binding cassette sub-family F member 2 [Spodoptera litura]
PB.2735.3	3815	XP_022832438.1	99.7	ATP-binding cassette sub-family F member 2 [Spodoptera litura]
PB.2808.1	3815	XP_022827378.1	99	ABC transporter G family member 23 [Spodoptera litura]
PB.2808.2	5858	XP_022827378.1	50.3	ABC transporter G family member 23 [Spodoptera litura]
PB.2808.3	4419	XP_022827378.1	98.9	ABC transporter G family member 23 [Spodoptera litura]
PB.2809.1	3912	XP_022827378.1	99	ABC transporter G family member 23 [Spodoptera litura]
PB.3256.1	4097	XP_022814829.1	99.4	ATP-binding cassette sub-family G member 4-like [Spodoptera litura]
PB.3257.1	4116	XP_022814829.1	99.4	ATP-binding cassette sub-family G member 4-like [Spodoptera litura]
PB.3257.2	3237	XP_022814829.1	99.4	ATP-binding cassette sub-family G member 4-like [Spodoptera litura]
PB.3413.1	4612	XP_022832765.1	99.5	multidrug resistance protein homolog 49-like [Spodoptera litura]
PB.3413.2	5088	XP_022832765.1	99.5	multidrug resistance protein homolog 49-like [Spodoptera litura]
PB.3413.3	3822	XP_022832765.1	99.6	multidrug resistance protein homolog 49-like [Spodoptera litura]
PB.3413.4	2471	XP_022832765.1	99.3	multidrug resistance protein homolog 49-like [Spodoptera litura]
PB.3521.1	4972	XP_022827411.1	99.2	ABC transporter G family member 20 [Spodoptera litura]
PB.3522.1	4845	XP_022827411.1	99.2	ABC transporter G family member 20 [Spodoptera litura]
PB.3558.1	7942	XP_022834446.1	98.6	ATP-binding cassette sub-family A member 3-like [Spodoptera litura]
PB.3558.2	7672	XP_022834446.1	98.7	ATP-binding cassette sub-family A member 3-like [Spodoptera litura]
PB.3853.1	3251	XP_022816188.1	98.3	ATP-binding cassette sub-family B member 7, mitochondrial isoform X1 [Spodoptera litura]
PB.3853.2	4654	XP_022816188.1	98.7	ATP-binding cassette sub-family B member 7, mitochondrial isoform X1 [Spodoptera litura]
PB.3853.3	3196	XP_022816190.1	98.3	ATP-binding cassette sub-family B member 7, mitochondrial isoform X1 [Spodoptera litura]
PB.389.1	2908	XP_022827322.1	100	ABC transporter G family member 20 isoform X2 [Spodoptera litura]
PB.389.2	2954	XP_022827324.1	100	ABC transporter G family member 20 isoform X4 [Spodoptera litura]
PB.390.1	2960	XP_022827322.1	100	ABC transporter G family member 20 isoform X2 [Spodoptera litura]
PB.390.2	3005	XP_022827321.1	100	ABC transporter G family member 20 isoform X1 [Spodoptera litura]
PB.4107.1	4187	XP_022816064.1	99.7	ATP-binding cassette sub-family D member 3 [Spodoptera litura]
PB.4108.1	4097	XP_022816064.1	99.7	ATP-binding cassette sub-family D member 3 [Spodoptera litura]
PB.4154.1	4109	XP_022814508.1	96.2	ATP-binding cassette sub-family G member 1 [Spodoptera litura]
PB.4154.2	3913	XP_022814508.1	93.9	ATP-binding cassette sub-family G member 1 [Spodoptera litura]
PB.4155.1	4051	XP_022814508.1	96.2	ATP-binding cassette sub-family G member 1 [Spodoptera litura]
PB.4380.1	3303	XP_022814309.1	99.6	ATP-binding cassette sub-family G member 4-like isoform X1 [Spodoptera litura]
PB.4380.3	3067	XP_022814309.1	99.6	ATP-binding cassette sub-family G member 4-like isoform X1 [Spodoptera litura]
PB.4385.1	6880	XP_022835136.1	98.2	multidrug resistance-associated protein 1 isoform X1 [Spodoptera litura]
PB.4385.2	6160	XP_022835136.1	97.8	multidrug resistance-associated protein 1 isoform X1 [Spodoptera litura]
PB.4385.3	4836	XP_022835137.1	99.7	multidrug resistance-associated protein 1 isoform X2 [Spodoptera litura]
PB.4385.4	3019	AKC34057.1	100	ABCC1-like protein [Spodoptera litura]
PB.4414.1	3666	XP_022819892.1	99.6	protein white [Spodoptera litura]
PB.4415.1	3632	XP_022819892.1	99.6	protein white [Spodoptera litura]
PB.5033.1	4647	XP_022829841.1	99.4	ATP-binding cassette sub-family G member 1 [Spodoptera litura]
PB.5162.1	4078	XP_022814670.1	98.6	ATP-binding cassette sub-family G member 1-like [Spodoptera litura]
PB.5196.1	3903	XP_022814668.1	98.5	ATP-binding cassette sub-family G member 1 [Spodoptera litura]
PB.5196.2	2742	XP_022814668.1	98.7	ATP-binding cassette sub-family G member 1 [Spodoptera litura]
PB.5319.1	3423	XP_022814990.1	97.2	ATP-binding cassette sub-family G member 4-like isoform X2 [Spodoptera litura]
PB.5347.1	3195	XP_021187141.1	99.2	ATP-binding cassette sub-family G member 4-like isoform X1 [Helicoverpa armigera]
PB.5409.1	3005	XP_022837972.1	99.4	ATP-binding cassette sub-family B member 6, mitochondrial [Spodoptera litura]
PB.5464.1	5834	XP_022835140.1	98.8	multidrug resistance-associated protein 1-like [Spodoptera litura]
PB.5474.1	2887	XP_022826568.1	97.9	ATP-binding cassette sub-family B member 10, mitochondrial [Spodoptera litura]
PB.971.1	5771	XP_022829795.1	99.4	multidrug resistance-associated protein 4-like [Spodoptera litura]
PB.987.1	5733	AKC34058.1	98.4	ABCC4-like protein [Spodoptera litura]

## Sheet: CES
Qeury		NR tophit
Name	Length	Accession number	Similarity (%)	Description
PB.1100.1	1965	XP_022828345.1	97.4	uncharacterized protein LOC111357771 [Spodoptera litura]
PB.1101.1	1761	XP_022828345.1	96.7	uncharacterized protein LOC111357771 [Spodoptera litura]
PB.1101.2	1461	XP_022828345.1	97.6	uncharacterized protein LOC111357771 [Spodoptera litura]
PB.1101.3	448	APD13869.1	97.7	putative carboxylesterase CXE3 [Spodoptera litura]
PB.1102.1	477	APD13869.1	97.7	putative carboxylesterase CXE3 [Spodoptera litura]
PB.1135.1	2270	AEL33701.1	96	carboxylesterase CXE28 [Spodoptera littoralis]
PB.1136.1	1944	APD13883.1	96.9	putative carboxylesterase CXE28 [Spodoptera litura]
PB.1136.2	1166	APD13883.1	96.7	putative carboxylesterase CXE28 [Spodoptera litura]
PB.1136.3	1027	APD13883.1	96.5	putative carboxylesterase CXE28 [Spodoptera litura]
PB.1148.1	5646	XP_022825018.1	61.5	acetylcholinesterase-like [Spodoptera litura]
PB.2379.1	5220	XP_022819835.1	99.4	acetylcholinesterase-like [Spodoptera litura]
PB.2379.2	4919	XP_022819835.1	99.4	acetylcholinesterase-like [Spodoptera litura]
PB.2380.1	4948	XP_022819835.1	99.6	acetylcholinesterase-like [Spodoptera litura]
PB.2380.2	5241	XP_022819835.1	99.6	acetylcholinesterase-like [Spodoptera litura]
PB.2490.1	2737	XP_022817425.1	94.7	juvenile hormone esterase-like [Spodoptera litura]
PB.2491.1	2030	XP_022817425.1	90.9	juvenile hormone esterase-like [Spodoptera litura]
PB.2681.1	3647	XP_022827852.1	96.9	venom carboxylesterase-6-like [Spodoptera litura]
PB.2681.2	3373	XP_022827852.1	96.9	venom carboxylesterase-6-like [Spodoptera litura]
PB.2681.3	3012	XP_022827852.1	96.9	venom carboxylesterase-6-like [Spodoptera litura]
PB.2681.4	2738	XP_022827852.1	96.8	venom carboxylesterase-6-like [Spodoptera litura]
PB.2968.1	2259	XP_022829770.1	96.4	cholinesterase 1-like isoform X3 [Spodoptera litura]
PB.2969.1	1352	ACV60231.1	95.7	antennal esterase CXE4 [Spodoptera littoralis]
PB.2996.1	1996	XP_022828459.1	94.9	bile salt-activated lipase-like isoform X1 [Spodoptera litura]
PB.2996.2	1763	XP_022828459.1	94.9	bile salt-activated lipase-like isoform X1 [Spodoptera litura]
PB.2996.3	1595	XP_022828459.1	95.1	bile salt-activated lipase-like isoform X1 [Spodoptera litura]
PB.2997.1	2150	ACV60241.1	96.9	antennal esterase CXE14 [Spodoptera littoralis]
PB.2998.1	2151	AEJ38205.1	96.3	antennal esterase CXE14 [Spodoptera exigua]
PB.3000.1	2781	ACV60241.1	94.9	antennal esterase CXE14 [Spodoptera littoralis]
PB.329.1	2921	XP_022815866.1	97.1	juvenile hormone esterase-like [Spodoptera litura]
PB.330.1	2823	XP_022815866.1	97.3	juvenile hormone esterase-like [Spodoptera litura]
PB.331.1	3080	XP_022815866.1	97.3	juvenile hormone esterase-like [Spodoptera litura]
PB.4578.1	1885	XP_022828343.1	93	esterase FE4-like [Spodoptera litura]
PB.4587.1	1843	XP_022827863.1	90	juvenile hormone esterase-like [Spodoptera litura]
PB.4618.1	1760	XP_022828344.1	91.9	juvenile hormone esterase-like [Spodoptera litura]
PB.4618.2	418	XP_022828344.1	92	juvenile hormone esterase-like [Spodoptera litura]
PB.5099.1	4403	XP_022824089.1	97.2	juvenile hormone esterase-like isoform X1 [Spodoptera litura]
PB.5384.1	3148	APD13878.1	97.2	putative carboxylesterase CXE20 [Spodoptera litura]
PB.5384.2	2599	APD13878.1	97.4	putative carboxylesterase CXE20 [Spodoptera litura]
PB.707.1	2441	APD13884.1	96.3	putative carboxylesterase CXE30 [Spodoptera litura]
PB.707.2	2155	APD13884.1	96.3	putative carboxylesterase CXE30 [Spodoptera litura]
PB.738.1	2385	ACV60237.1	94.8	antennal esterase CXE10 [Spodoptera littoralis]
PB.739.1	2024	XP_022827864.1	65.2	esterase FE4-like [Spodoptera litura]
PB.964.1	2059	ACV60236.1	98.7	antennal esterase CXE9 [Spodoptera littoralis]
PB.981.1	1901	XP_022837633.1	95.2	venom carboxylesterase-6-like isoform X2 [Spodoptera litura]
PB.981.2	2707	XP_022837632.1	97.8	venom carboxylesterase-6-like isoform X1 [Spodoptera litura]
PB.982.1	2048	XP_022837633.1	95	venom carboxylesterase-6-like isoform X2 [Spodoptera litura]

## Sheet: GST
Qeury		NR tophit
Name	Length	Accession number	Similarity (%)	Description
PB.1571.1	1559	XP_022834789.1	97.9	ganglioside-induced differentiation-associated protein 1-like [Spodoptera litura]
PB.1764.1	1326	XP_022834603.1	97.4	glutathione S-transferase theta-1-like [Spodoptera litura]
PB.1811.1	417	AYM01160.1	96.6	glutathione-S-transferase epsilon class [Spodoptera littoralis]
PB.1813.1	1269	AYM01160.1	95.9	glutathione-S-transferase epsilon class [Spodoptera littoralis]
PB.1813.2	833	AYM01160.1	95.9	glutathione-S-transferase epsilon class [Spodoptera littoralis]
PB.1954.1	1078	AYM01151.1	98.8	glutathione-S-transferase delta class [Spodoptera littoralis]
PB.2006.1	1035	AYM01179.1	94.1	glutathione-S-transferase sigma class [Spodoptera littoralis]
PB.2007.1	1034	AYM01163.1	95.4	glutathione-S-transferase epsilon class [Spodoptera littoralis]
PB.2020.1	1014	AYM01172.1	98.4	glutathione-S-transferase omega class [Spodoptera littoralis]
PB.2021.1	931	AYM01172.1	98.4	glutathione-S-transferase omega class [Spodoptera littoralis]
PB.2066.1	974	XP_022816224.1	89.3	uncharacterized protein LOC111349356 [Spodoptera litura]
PB.2067.1	922	XP_022816224.1	88.2	uncharacterized protein LOC111349356 [Spodoptera litura]
PB.2084.1	945	XP_022815498.1	97.7	glutathione S-transferase 1-like isoform X3 [Spodoptera litura]
PB.2122.1	908	AYM01176.1	99.5	glutathione-S-transferase sigma class [Spodoptera littoralis]
PB.2123.1	774	AYM01176.1	94.1	glutathione-S-transferase sigma class [Spodoptera littoralis]
PB.2143.2	873	XP_022822882.1	98.5	glutathione S-transferase 2-like [Spodoptera litura]
PB.3302.1	1779	XP_022816223.1	80.8	uncharacterized protein LOC111349355 [Spodoptera litura]
PB.3302.2	984	XP_022816223.1	87.8	uncharacterized protein LOC111349355 [Spodoptera litura]
PB.3303.1	2121	AYM01165.1	48.9	glutathione-S-transferase epsilon class [Spodoptera littoralis]
PB.3303.2	959	XP_022816223.1	87.3	uncharacterized protein LOC111349355 [Spodoptera litura]
PB.3383.1	828	AYM01159.1	61.5	glutathione-S-transferase epsilon class [Spodoptera littoralis]
PB.3384.1	840	AYM01159.1	98.2	glutathione-S-transferase epsilon class [Spodoptera littoralis]
PB.3412.1	1246	AEG75844.1	94.6	glutathione S-transferase s3 protein [Spodoptera litura]
PB.3588.1	4970	XP_022832762.1	98.7	prostaglandin E synthase 2 [Spodoptera litura]
PB.3589.1	4950	XP_022832762.1	98.7	prostaglandin E synthase 2 [Spodoptera litura]
PB.3905.1	4555	XP_022832613.1	99.4	failed axon connections [Spodoptera litura]
PB.3905.2	4212	XP_022832613.1	99.1	failed axon connections [Spodoptera litura]
PB.3905.3	3436	XP_022832613.1	99.4	failed axon connections [Spodoptera litura]
PB.4701.1	5248	XP_022818064.1	97.9	bifunctional glutamate/proline--tRNA ligase [Spodoptera litura]
PB.4750.1	1419	AYM01185.1	94.8	glutathione-S-transferase zeta class [Spodoptera littoralis]
PB.4753.1	1407	XP_026752660.1	90.3	elongation factor 1-gamma [Galleria mellonella]
PB.4753.2	691	PCG68302.1	92.2	hypothetical protein B5V51_5388 [Heliothis virescens]
PB.4913.1	820	AYM01161.1	95.9	glutathione-S-transferase epsilon class [Spodoptera littoralis]

## Sheet: UGT
Qeury		NR tophit
Name	Length	Accession number	Similarity (%)	Description
PB.1166.1	1919	XP_022814023.1	96.4	UDP-glucuronosyltransferase 2B4-like [Spodoptera litura]
PB.1171.1	1784	XP_022826785.1	98.3	UDP-glucuronosyltransferase 1-5-like [Spodoptera litura]
PB.1172.1	1913	XP_022826785.1	97.3	UDP-glucuronosyltransferase 1-5-like [Spodoptera litura]
PB.1289.1	1813	XP_022819123.1	96.5	UDP-glucuronosyltransferase 2B2-like [Spodoptera litura]
PB.1289.2	1668	XP_022819123.1	96.7	UDP-glucuronosyltransferase 2B2-like [Spodoptera litura]
PB.1413.1	1703	AHY99685.1	97.6	UDP-glycosyltransferase 40L2 [Spodoptera littoralis]
PB.2520.1	3052	XP_022834356.1	98.5	UDP-glucuronosyltransferase 2C1 [Spodoptera litura]
PB.2521.1	2969	XP_022834356.1	98.5	UDP-glucuronosyltransferase 2C1 [Spodoptera litura]
PB.2526.1	1766	XP_022837180.1	96.6	UDP-glucuronosyltransferase 2B10-like [Spodoptera litura]
PB.2746.1	1711	XP_022837180.1	94.2	UDP-glucuronosyltransferase 2B10-like [Spodoptera litura]
PB.2746.2	2824	XP_022837180.1	94.2	UDP-glucuronosyltransferase 2B10-like [Spodoptera litura]
PB.2746.3	1831	XP_022837180.1	94.2	UDP-glucuronosyltransferase 2B10-like [Spodoptera litura]
PB.2866.1	564	AHY99680.1	93.2	UDP-glycosyltransferase 33B13 [Spodoptera littoralis]
PB.2894.1	1685	ANI21987.1	92.1	UDP-glycosyltransferase 33B15 [Spodoptera exigua]
PB.2894.2	1803	ANI21987.1	92.1	UDP-glycosyltransferase 33B15 [Spodoptera exigua]
PB.3106.1	1806	XP_022815720.1	90.2	UDP-glucuronosyltransferase 2B10-like [Spodoptera litura]
PB.3106.2	1635	XP_022815720.1	93.2	UDP-glucuronosyltransferase 2B10-like [Spodoptera litura]
PB.3206.1	1612	XP_022837186.1	93.2	UDP-glucuronosyltransferase 2B20-like [Spodoptera litura]
PB.3206.2	3745	XP_022837186.1	95	UDP-glucuronosyltransferase 2B20-like [Spodoptera litura]
PB.3273.1	4260	XP_022837627.1	96	UDP-glucuronosyltransferase 2B19-like [Spodoptera litura]
PB.3273.2	1728	AHY99680.1	95.5	UDP-glycosyltransferase 33B13 [Spodoptera littoralis]
PB.4525.1	2046	XP_022815397.1	92.1	UDP-glucuronosyltransferase 2B10-like [Spodoptera litura]
PB.4581.1	1875	ANI22004.1	89.7	UDP-glycosyltransferase 40F5 [Spodoptera exigua]
PB.4631.1	1748	AHY99686.1	95.4	UDP-glycosyltransferase 40R3 [Spodoptera littoralis]
PB.5376.1	3160	XP_022815547.1	96.2	UDP-glucuronosyltransferase 2B15-like [Spodoptera litura]
PB.5572.1	1906	ANI22001.1	95.3	UDP-glycosyltransferase 40D5 [Spodoptera exigua]
PB.5572.2	2512	ANI22001.1	95.3	UDP-glycosyltransferase 40D5 [Spodoptera exigua]
PB.5652.1	2234	XP_022815411.1	91.6	UDP-glucuronosyltransferase 2B14-like [Spodoptera litura]
PB.5658.1	2215	XP_022837187.1	93.7	UDP-glucuronosyltransferase 2B19-like [Spodoptera litura]
PB.873.1	2109	ANI22012.1	95.1	UDP-glycosyltransferase 42C2 [Spodoptera exigua]
PB.873.2	1620	ANI22012.1	95.5	UDP-glycosyltransferase 42C2 [Spodoptera exigua]
